# Supplementary material for: Plasma electrolysis allows the facile and efficient production of graphite oxide from recycled graphite
Source: Royal Society of Chemistry journal article supplement (doi:10.1039/c3ra43084g), 2013-01-01
Supplement: c3ra43084g.pdf [file c3ra43084g.pdf]

## Supporting Information

### **S1. Video of plasma electrolytic processing:**

Cathodic plasma 1: Demonstration movie by high-speed camera.

Cathodic plasma 2: Demonstration movie by regular camera.

### **S2. Characterization of HPEGO made by high purity graphite as the starting material:**

S2 presents SEM image of the HG and HPEGO samples; they confirm further large structural changes in the as-received samples. Clearly, multilayered graphite clusters were transformed into the crumpled-like structure after having been subjected to the CP process.

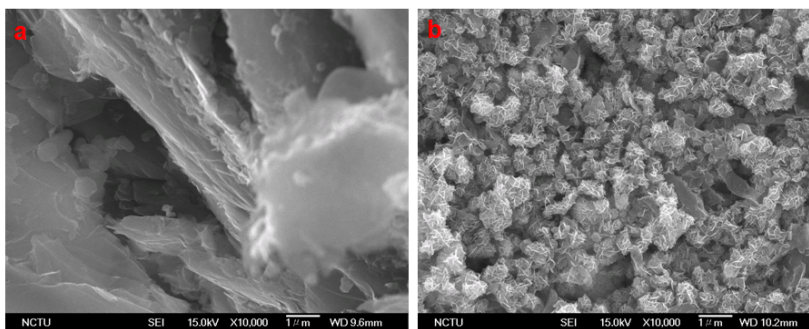

S2 SEM images of the (a) HG, and (b) HPEGO samples;
